# Supplementary material for: A randomized, double-blind, control trial study to compare clinical outcomes of users and nonusers of a walking support machine after total knee replacement surgery
Source: Research Square preprint supplement (doi:10.21203/rs.3.rs-2463380/v1), 2023-01-16
Supplement: Supplementary file 1 [file 1dd089c7499a738d4daf1ccf.docx]

Table 4 TUG, WOMAC between Co-Walk and Non Co-walk.

|  | **total** | **Co-walk** | **P*** | **Non Co-walk** | **P*** | **P**** |
| --- | --- | --- | --- | --- | --- | --- |
|  | **(n = 62)** | **(n = 31)** |  | **(n = 31)** |  |  |
| **TUG** |  |  |  |  |  |  |
| 1-2 day after surgery | 69.93±17.34 | 71.82±16.65 | <0.001 | 68.03±18.07 | <0.001 | 0.394 |
| 2wk after surgery | 30.01±16.87 | 18.10±6.45 |  | 41.92±15.62 |  | <0.001 |
| 6wk after surgery | 18.09±10.41 | 13.23±3.32 |  | 22.94±12.67 |  | <0.001 |
| 3mo after surgery | 14.08±7.05 | 11.69±2.52 |  | 16.47±9.10 |  | 0.008 |
| 6mo after surgery | 11.90±4.69 | 11.04±1.87 |  | 12.76±6.29 |  | 0.153 |
| Average day 1- 6mo | 28.80±8.33 | 25.18±3.81 |  | 32.43±9.98 |  | 0.769 |
| **WOMAC** |  |  |  |  |  |  |
| **Pain** |  |  |  |  |  |  |
| 1-2 day after surgery | 30.05±10.10 | 29.23±10.58 | <0.001 | 30.87±9.71 | <0.001 | 0.526 |
| 2wk after surgery | 17.90±7.15 | 13.29±5.49 |  | 22.52±5.47 |  | <0.001 |
| 6wk after surgery | 12.85±7.05 | 10.84±5.75 |  | 14.87±7.73 |  | 0.023 |
| 3mo after surgery | 10.87±8.70 | 8.00±7.46 |  | 13.74±9.02 |  | 0.008 |
| 6mo after surgery | 7.42±6.02 | 6.74±6.75 |  | 8.10±5.20 |  | 0.380 |
| Average day 1- 6mo | 15.82±5.24 | 13.62±4.91 |  | 18.02±4.65 |  | 0.001 |
| **Movement** |  |  |  |  |  |  |
| 1-2 day after surgery | 94.66±24.87 | 94.87±23.04 | <0.001 | 94.45±26.96 | <0.001 | 0.948 |
| 2wk after surgery | 49.81±19.08 | 36.10±13.78 |  | 63.52±12.71 |  | <0.001 |
| 6wk after surgery | 41.69±16.04 | 33.00±15.26 |  | 50.39±11.58 |  | <0.001 |
| 3mo after surgery | 30.40±19.94 | 20.84±18.29 |  | 39.97±16.87 |  | <0.001 |
| 6mo after surgery | 20.52±15.89 | 13.39±17.09 |  | 27.65±10.80 |  | <0.001 |
| Average day 1- 6mo | 47.42±13.85 | 39.64±11.78 |  | 55.19±11.24 |  | <0.001 |
| **Stiff** |  |  |  |  |  |  |
| 1-2 day after surgery | 12.44±4.42 | 12.32±3.70 | <0.001 | 12.55±5.10 | <0.001 | 0.843 |
| 2wk after surgery | 8.10±4.06 | 6.03±3.62 |  | 10.16±3.42 |  | <0.001 |
| 6wk after surgery | 6.05±3.15 | 5.29±2.77 |  | 6.81±3.36 |  | 0.057 |
| 3mo after surgery | 5.06±3.65 | 4.39±3.07 |  | 5.74±4.08 |  | 0.145 |
| 6mo after surgery | 3.42±3.04 | 3.39±2.78 |  | 3.45±3.33 |  | 0.934 |
| Average day 1- 6mo | 7.01±2.32 | 6.28±2.00 |  | 7.74±2.43 |  | 0.012 |

Mean±sd.

* p-value within group related mean 1-2 day to 6 months after surgery by repeated measure ANOVA .

** p-value for comparison of mean between group by Independent t test.
